# Supplementary material for: Up-regulation of tumor suppressor genes by exogenous dhC16-Cer contributes to its anti-cancer activity in primary effusion lymphoma
Source: PubMed Central journal article supplement (PMC5362481; doi:10.18632/oncotarget.14838), 2017-01-27
Supplement: oncotarget-08-15220-s001.pdf [file oncotarget-08-15220-s001.pdf]

# Up-regulation of tumor suppressor genes by exogenous dhC16-Cer contributes to its anti-cancer activity in primary effusion lymphoma

## Supplementary Materials

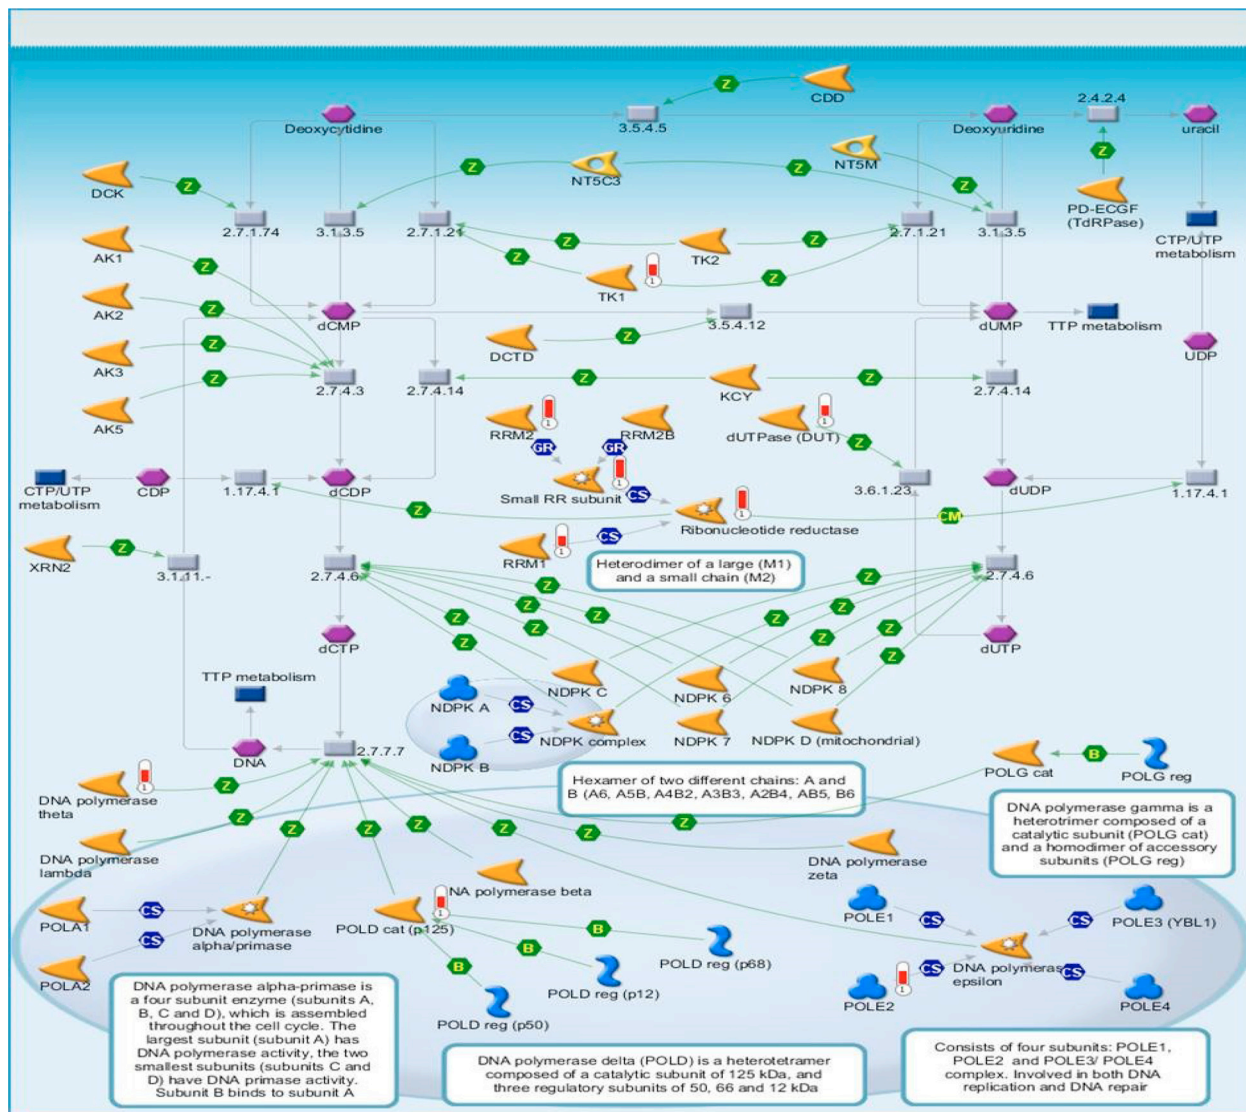

**Supplementary Figure 1: The top scored maps (maps with the lowest *p* value) based on the enrichment distribution: dCTP/dUTP metabolism.** Experimental data from all files is linked to and visualized on the maps as thermometer like figures. Up-ward thermometers have red color and indicate upregulated signals and down ward (blue) ones indicate downregulated expression levels of the genes. Data was produced by the MetaCore Software (Thompson Reuters).

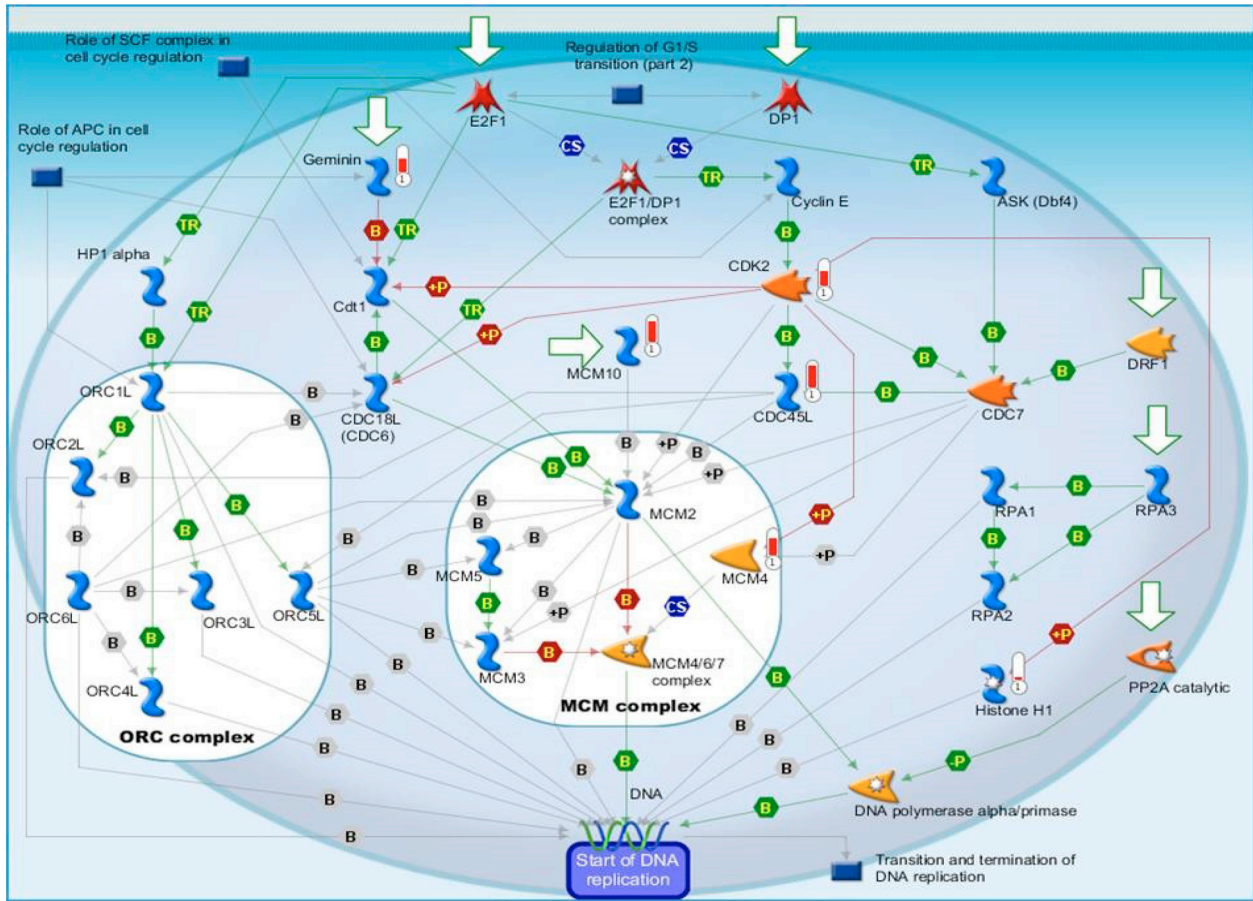

**Supplementary Figure 2: The second scored maps (maps with the lowest *p* value) based on the enrichment distribution: cell cycle\_start of DNA replication in early S phase.** Experimental data from all files is linked to and visualized on the maps as thermometer like figures. Up-ward thermometers have red color and indicate upregulated signals and down ward (blue) ones indicate downregulated expression levels of the genes.

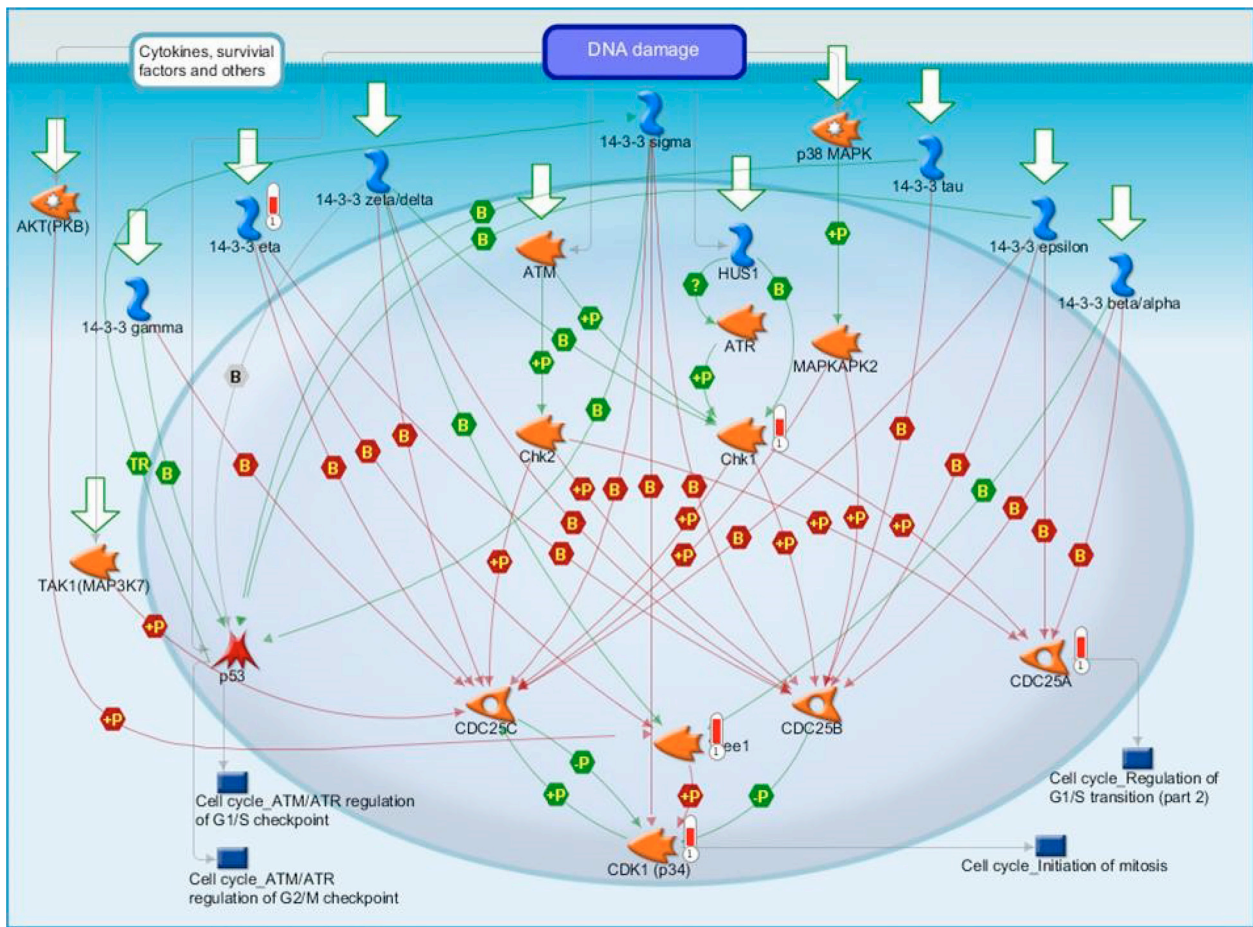

**Supplementary Figure 3: The third scored maps (maps with the lowest *p* value) based on the enrichment distribution: cell cycle\_role of 14-3-3 proteins in cell cycle regulation.** Experimental data from all files is linked to and visualized on the maps as thermometer like figures. Up-ward thermometers have red color and indicate upregulated signals and down-ward (blue) ones indicate downregulated expression levels of the genes.

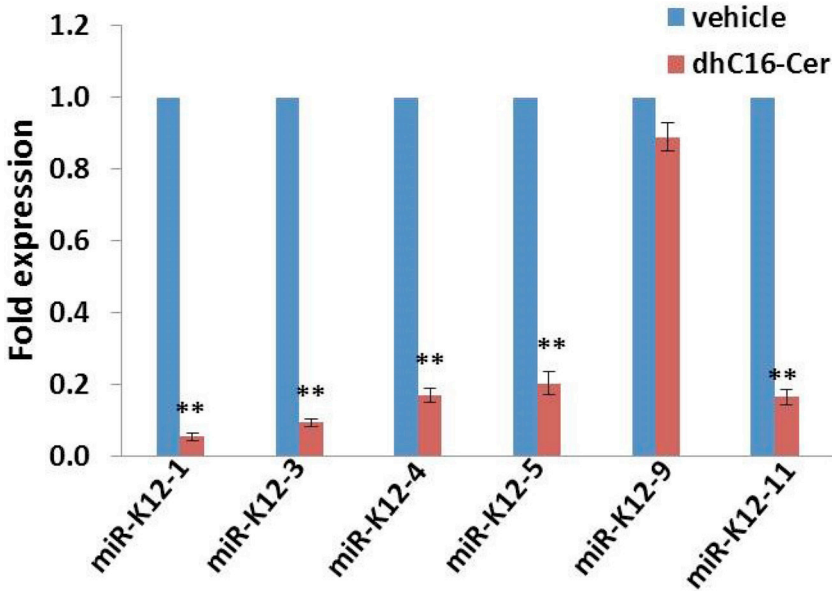

**Supplementary Figure 4: Repression of KSHV microRNAs by dhC16-Cer from BCP-1 cells.** BCP-1 were incubated with dhC16-Cer (40  $\mu$ M) or vehicle for 24 h, then KSHV microRNA transcripts were quantified using qRT-PCR as described in Methods. Error bars represent the S.E.M. for 3 independent experiments. \*\* = *p* < 0.01.

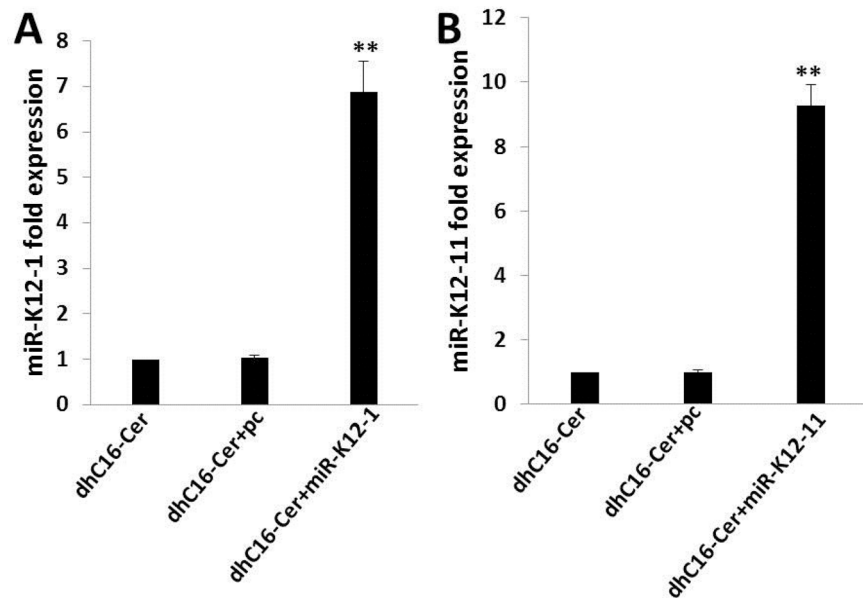

**Supplementary Figure 5: Restoration of KSHV miRNA expression during dhC16-Cer treatment.** BCBL-1 were first transfected with control vector (pc), vectors encoding miR-K12-1 or miR-K12-11 for 48 h. Thereafter, cells were incubated with dhC16-Cer (40  $\mu$ M) for additional 24 h. The KSHV microRNA transcripts were quantified using qRT-PCR as described in Methods. Error bars represent the S.E.M. for 3 independent experiments. \*\* =  $p < 0.01$ .

**Supplementary Table 1: The tumor suppressor genes altered within dhC16-Cer treated KSHV+ BCBL-1 cells (vs vehicle-treated cells)**

| Gene Symbol | Gene Description                                          |
|-------------|-----------------------------------------------------------|
| AIM2        | Absent in melanoma 2                                      |
| BTG3        | BTG family, member 3                                      |
| CADM1       | Cell adhesion molecule 1                                  |
| CDK2        | Cyclin-dependent kinase 2                                 |
| CHD5        | Chromodomain helicase DNA binding protein 5               |
| CHEK1       | CHK1 checkpoint homolog                                   |
| CXXC5       | CXXC finger 5                                             |
| E2F2        | E2F transcription factor 2                                |
| EAF2        | ELL associated factor 2                                   |
| EDNRB       | Endothelin receptor type B                                |
| EGR1        | Early growth response 1                                   |
| EZH2        | Enhancer of zeste homolog 2                               |
| HRASLS2     | HRAS-like suppressor 2                                    |
| HSP90B1     | Heat shock protein 90kDa beta                             |
| IGFBP4      | Insulin-like growth factor binding protein 4              |
| IKZF1       | IKAROS family zinc finger 1                               |
| ITGB1       | Integrin, beta 1 (fibronectin receptor, beta polypeptide) |
| KLF6        | Kruppel-like factor 6                                     |
| MSH2        | MutS homolog 2, colon cancer, nonpolyposis type 1         |
| RHOB        | Ras homolog gene family, member B                         |
| S100A2      | S100 calcium binding protein A2                           |
| SGMS1       | Sphingomyelin synthase 1                                  |
| THBS1       | Thrombospondin 1                                          |
| TNFRSF12A   | Tumor necrosis factor receptor superfamily, member 12A    |
| USP12       | Ubiquitin specific peptidase 12                           |

**Supplementary Table 2: Primer sequences for qRT-PCR**

| Gene           | Sequences (5'→3')               |
|----------------|---------------------------------|
| CCL3           | sense CACTTGCTGCTGACACGC        |
|                | antisense GGTCGCTGACATATTTCTGG  |
| TRIML2         | sense CTCAGCCCTCAGTTACAGC       |
|                | antisense CATCGCCATTCTTTCTTG    |
| RHOB           | sense GCCGACATTGAGGTGGACG       |
|                | antisense TGGGCACATTGGGACAGA    |
| THBS1          | sense ACCGATTCCGCCGATTC         |
|                | antisense TGACAGTCTGGACGAGTTCTT |
| KLF6           | sense TCCACGCCTCCATCTTCT        |
|                | antisense CATCGCCATTCCCTTGT     |
| DHRS2          | sense CCAAGGACATCCGGGTAA        |
|                | antisense CAGAGCCGAGTGGAGTAGC   |
| HIST2H2AA3     | sense GTGGCAAGCAAGGAGGCA        |
|                | antisense CTGGAGGTGACGAGGGATG   |
| H2AFJ          | sense CTGGCGGC GGTGTTGGAGTA     |
|                | antisense CAGCACGGCCTGGATGTT    |
| RGS2           | sense GATTGGAAGACCCGTTTG        |
|                | antisense CCCTGAATGCAGCAAGAC    |
| GADD45B        | sense CAAATCCACTTCACGCTCATC     |
|                | antisense GGGACCCACTGGTTGTTGC   |
| AIM2           | sense AAAGCCACTAAGTCAAGC        |
|                | antisense TGTAGCCACTGTAGCATG    |
| BTG3           | sense TTCACAAGGCTAGTTCGA        |
|                | antisense CACAGGCTTTCAGGACAT    |
| CHD5           | sense TCTACGACTCGGACTGGAAC      |
|                | antisense GGTGGGTGAGCATCATCTT   |
| E2F2           | sense AGACTCGGTATGACACTTCGC     |
|                | antisense GCCTACCCACTGGATGTTG   |
| EDNRB          | sense AAGGAAGTTATCTGCGAATC      |
|                | antisense AGAGGGCAAAGACAAGGA    |
| S100A2         | sense CCAAGAGGGCGACAAGTT        |
|                | antisense TGATGAGTGCCAGGAAA     |
| USP12          | sense TTCCATAGCATAGCCACT        |
|                | antisense CCATTAGGTAAACGACCA    |
| $\beta$ -actin | sense GGAAATCGTGCGTGACATT       |
|                | antisense GACTCGTCATACTCCTGCTTG |
